# Supplementary material
Source: Royal Society of Chemistry journal article supplement (doi:10.1039/d6fd00032k)
Supplement: d6fd00032k1.pdf [file d6fd00032k1.pdf]

# Supplementary Information for “Machine Learning Modeling of Temperature-Dependent Optoelectronic Properties of Anharmonic Solid Solutions”

Pol Benítez and Cibrán López

*Department of Physics, Universitat Politècnica de Catalunya, Barcelona 08019, Spain and  
Research Center in Multiscale Science and Engineering,  
Universitat Politècnica de Catalunya, 08019 Barcelona, Spain*

Edgardo Saucedo

*Research Center in Multiscale Science and Engineering,  
Universitat Politècnica de Catalunya, 08019 Barcelona, Spain and  
Departament d'Enginyeria Electrònica,  
Universitat Politècnica de Catalunya, 08034 Barcelona, Spain*

Claudio Cazorla

*Department of Physics, Universitat Politècnica de Catalunya, Barcelona 08019, Spain  
Research Center in Multiscale Science and Engineering,  
Universitat Politècnica de Catalunya, 08019 Barcelona, Spain and  
Institució Catalana de Recerca i Estudis Avançats (ICREA),  
Passeig Lluís Companys 23, 08010 Barcelona, Spain*

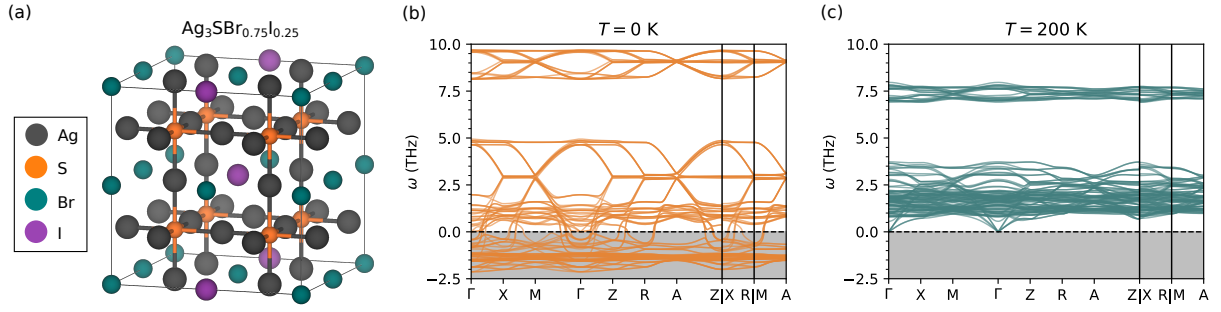

**Supplementary Figure 1:** (a) Representation of the equilibrium structure determined for the solid solution  $\text{Ag}_3\text{SBr}_{0.75}\text{I}_{0.25}$ . Phonon dispersions calculated at (b) zero temperature, and (c) at  $T = 200 \text{ K}$ .

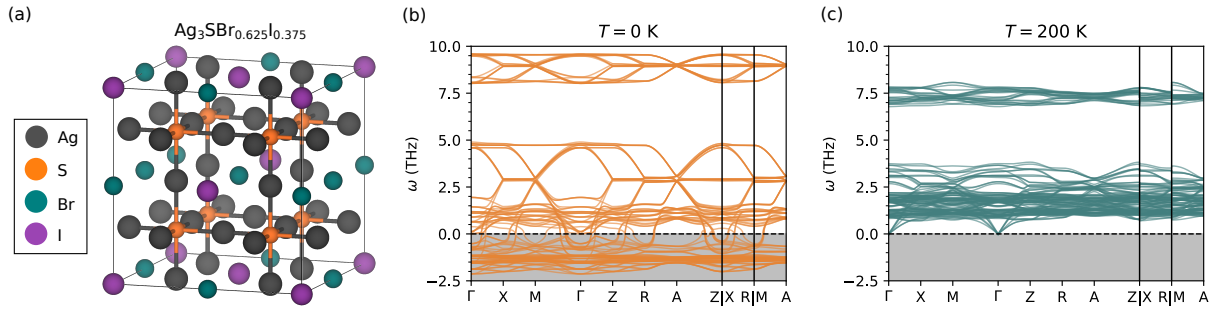

**Supplementary Figure 2:** (a) Representation of the equilibrium structure determined for the solid solution  $\text{Ag}_3\text{SBr}_{0.625}\text{I}_{0.375}$ . Phonon dispersions calculated at (b) zero temperature, and (c) at  $T = 200 \text{ K}$ .

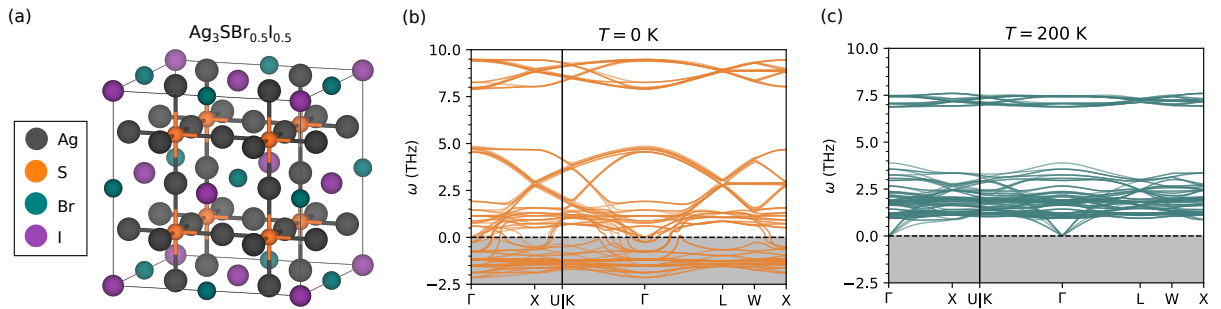

**Supplementary Figure 3:** (a) Representation of the equilibrium structure determined for the solid solution  $\text{Ag}_3\text{SBr}_{0.5}\text{I}_{0.5}$ . Phonon dispersions calculated at (b) zero temperature, and (c) at  $T = 200 \text{ K}$ .

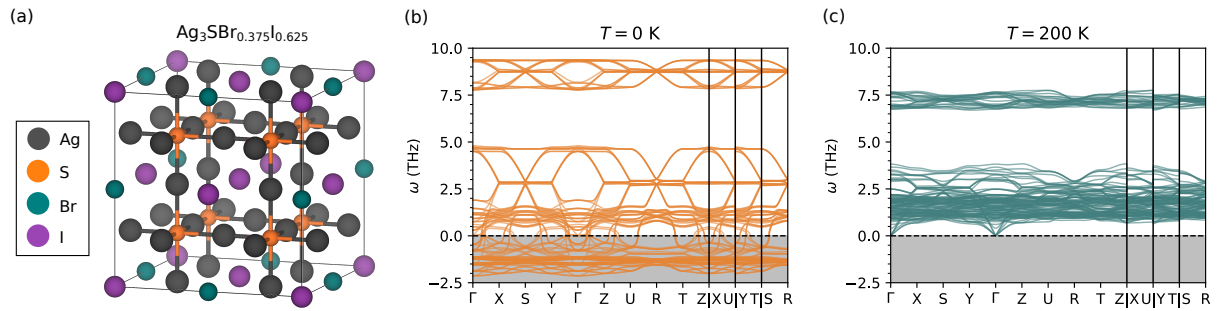

**Supplementary Figure 4:** (a) Representation of the equilibrium structure determined for the solid solution  $\text{Ag}_3\text{SBr}_{0.375}\text{I}_{0.625}$ . Phonon dispersions calculated at (b) zero temperature, and (c) at  $T = 200 \text{ K}$ .

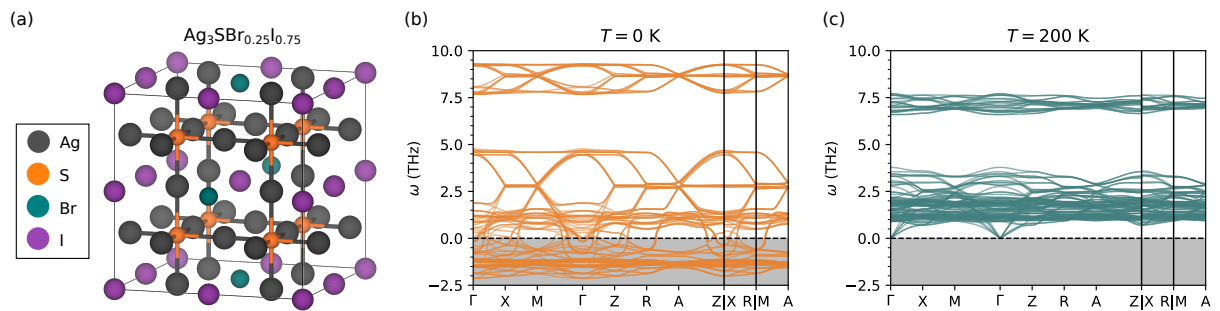

**Supplementary Figure 5:** (a) Representation of the equilibrium structure determined for the solid solution  $\text{Ag}_3\text{SBr}_{0.25}\text{I}_{0.75}$ . Phonon dispersions calculated at (b) zero temperature, and (c) at  $T = 200 \text{ K}$ .

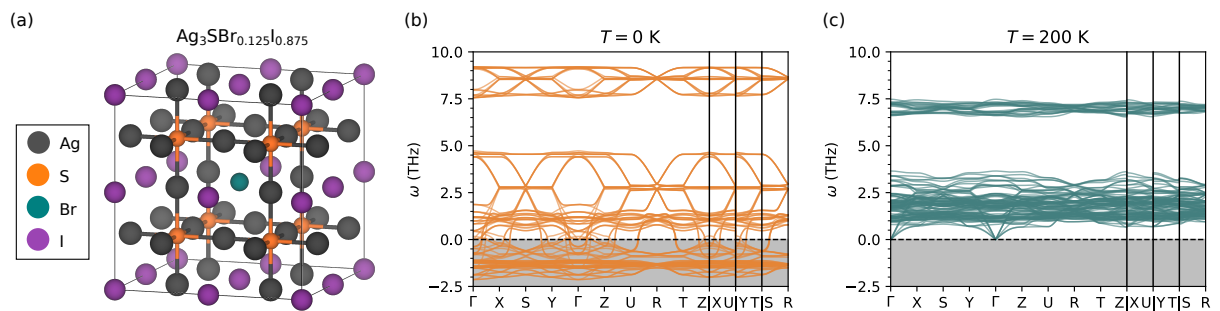

**Supplementary Figure 6:** (a) Representation of the equilibrium structure determined for the solid solution  $\text{Ag}_3\text{SBr}_{0.125}\text{I}_{0.875}$ . Phonon dispersions calculated at (b) zero temperature, and (c) at  $T = 200 \text{ K}$ .

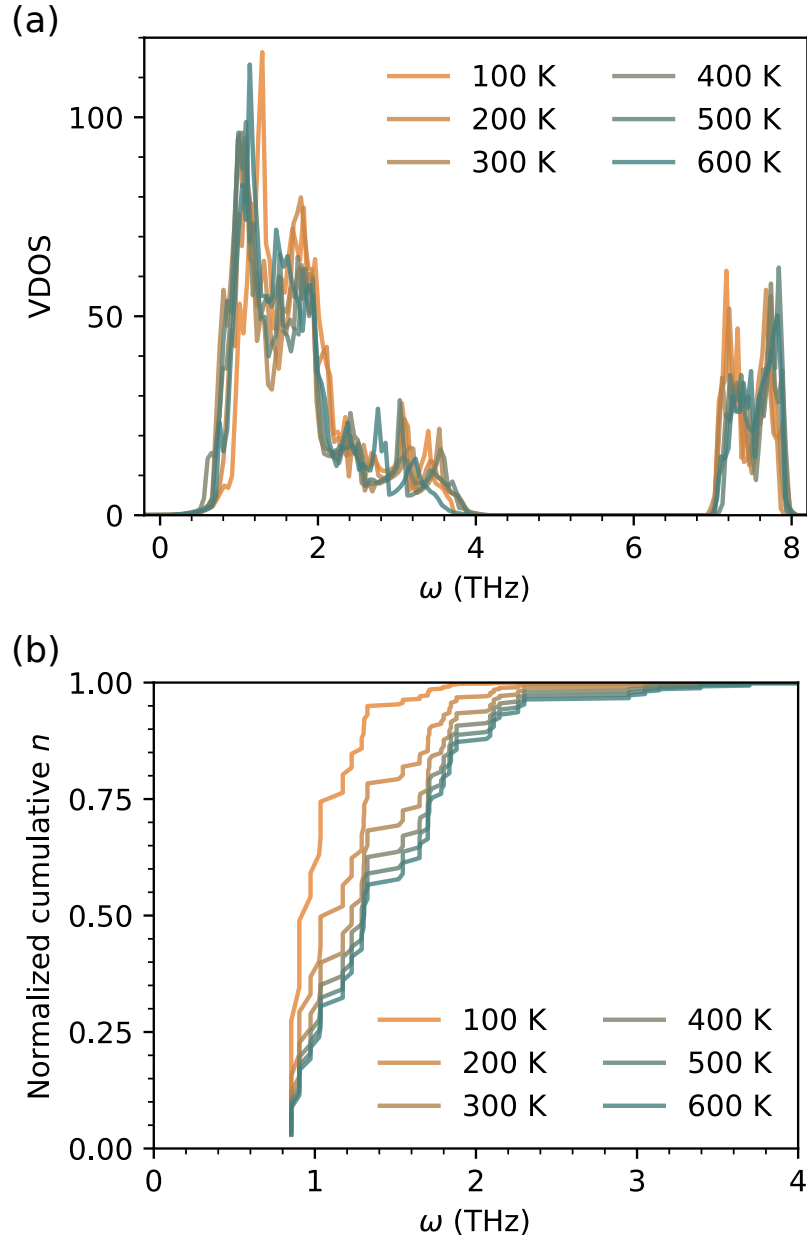

**Supplementary Figure 7:** (a) Temperature-dependence of the vibrational density of states (VDOS).  $T$ -renormalised VDOS were calculated by performing Fourier transform of the velocity autocorrelation function obtained from molecular dynamics simulations. (b) Normalized cumulative VDOS occupation for the solid solution  $\text{Ag}_3\text{SBr}_{0.875}\text{I}_{0.125}$  (considering  $\Gamma$ -point phonons only).

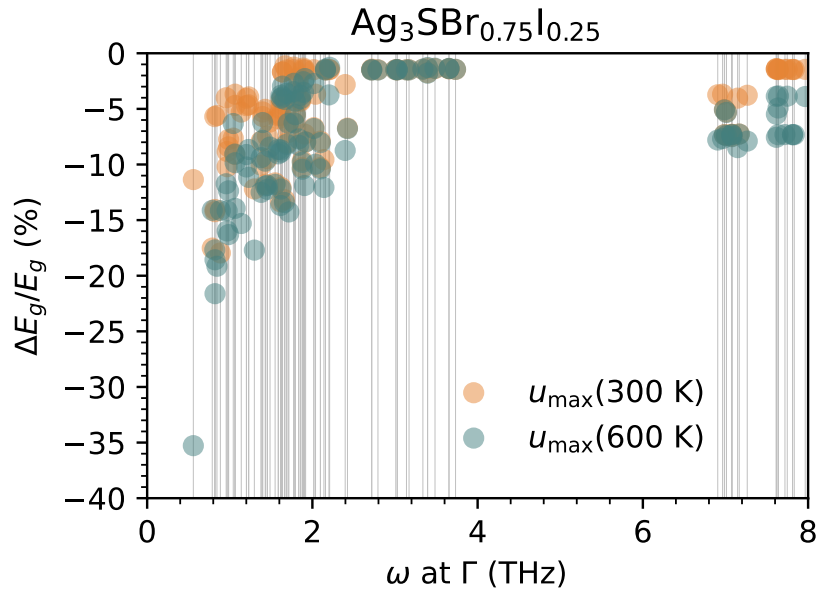

**Supplementary Figure 8:** Predicted relative band-gap change upon  $\Gamma$ -phonon mode distortions at 300 and 600 K for Ag<sub>3</sub>SBr<sub>0.75</sub>I<sub>0.25</sub>.

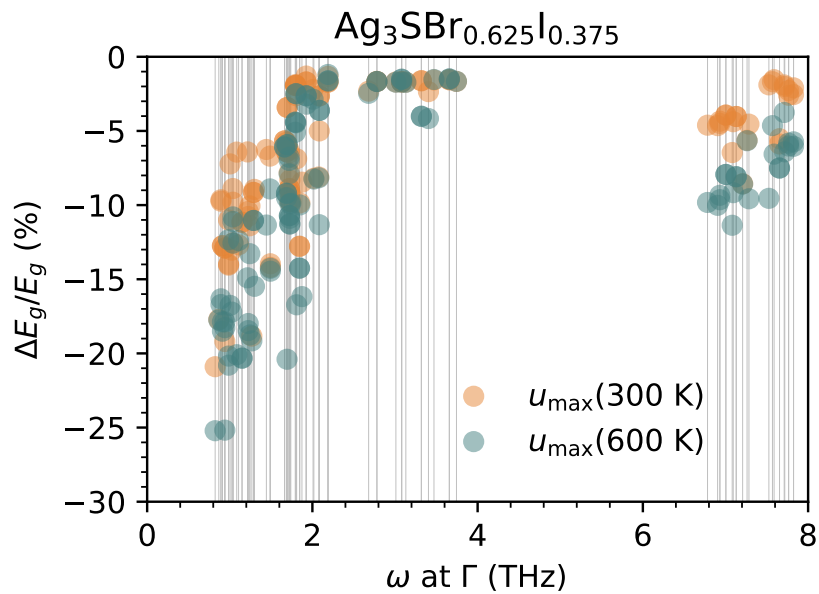

**Supplementary Figure 9:** Predicted relative band-gap change upon  $\Gamma$ -phonon mode distortions at 300 and 600 K for Ag<sub>3</sub>SBr<sub>0.625</sub>I<sub>0.375</sub>.

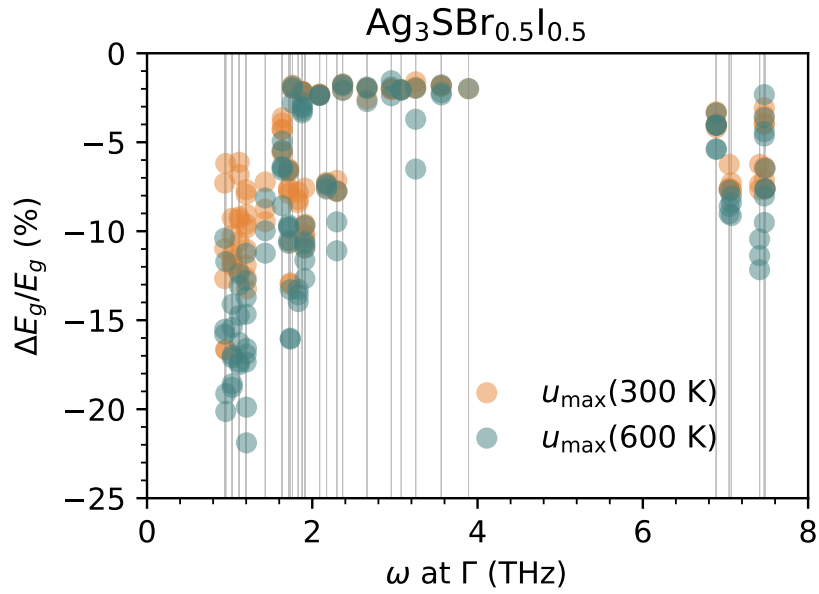

**Supplementary Figure 10:** Predicted relative band-gap change upon  $\Gamma$ -phonon mode distortions at 300 and 600 K for Ag<sub>3</sub>SBr<sub>0.5</sub>I<sub>0.5</sub>.

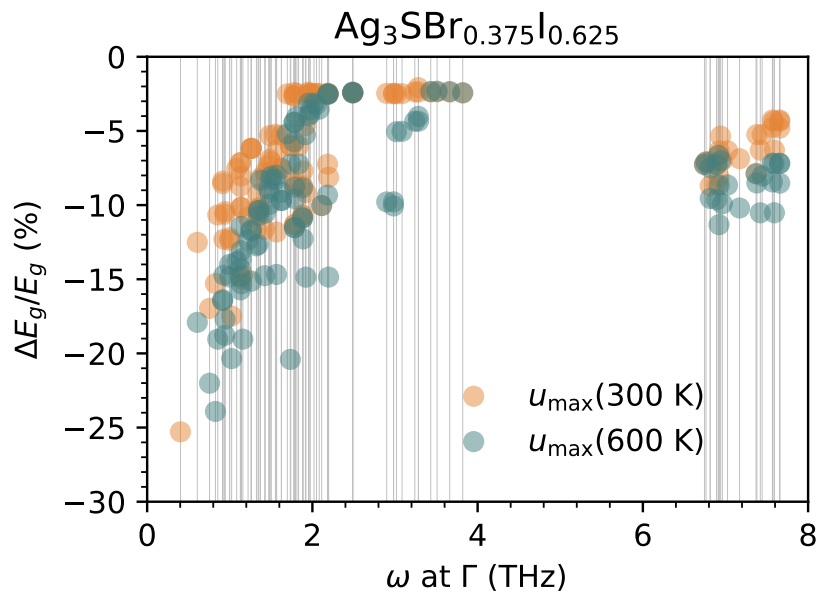

**Supplementary Figure 11:** Predicted relative band-gap change upon  $\Gamma$ -phonon mode distortions at 300 and 600 K for Ag<sub>3</sub>SBr<sub>0.375</sub>I<sub>0.625</sub>.

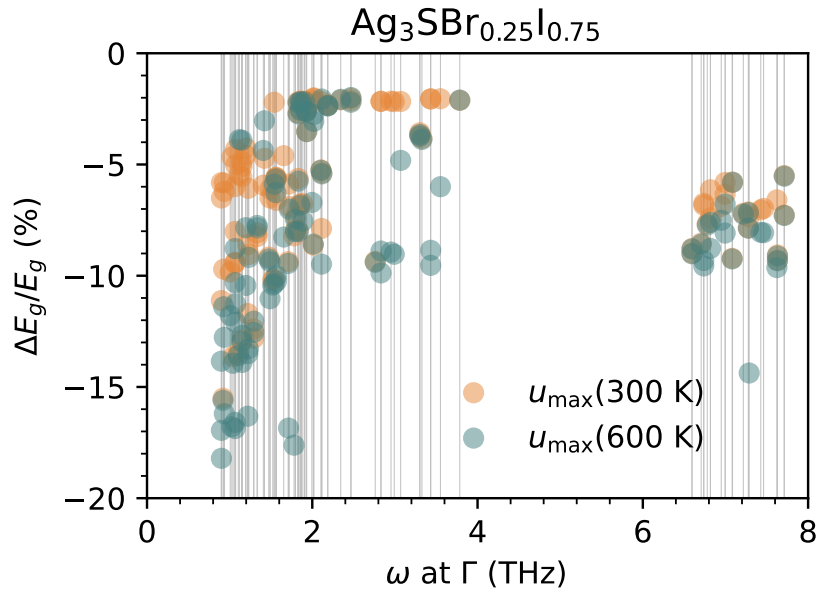

**Supplementary Figure 12:** Predicted relative band-gap change upon  $\Gamma$ -phonon mode distortions at 300 and 600 K for Ag<sub>3</sub>SBr<sub>0.25</sub>I<sub>0.75</sub>.

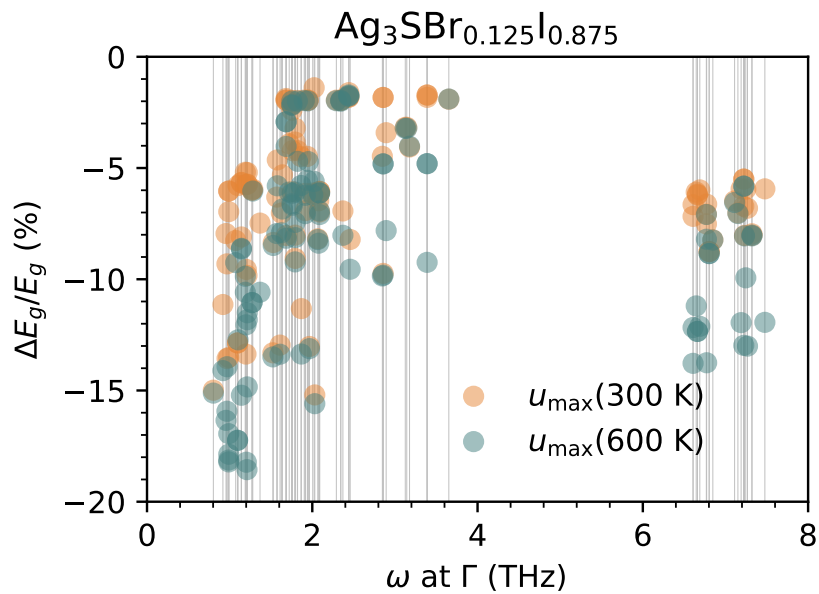

**Supplementary Figure 13:** Predicted relative band-gap change upon  $\Gamma$ -phonon mode distortions at 300 and 600 K for Ag<sub>3</sub>SBr<sub>0.125</sub>I<sub>0.875</sub>.

## SUPPLEMENTARY DISCUSSION

To calculate the normalized cumulative occupation of vibrational states,  $\chi(\omega, T)$ , as function of phonon frequency,  $\omega$ , and temperature,  $T$ , we employed the formula (Supplementary Fig. 7):

$$\chi(\omega, T) = \frac{\int_0^\omega g(z, T) n_{\text{BE}}(z, T) dz}{\int_0^\infty g(z, T) n_{\text{BE}}(z, T) dz}, \quad (1)$$

where  $g$  is the vibrational density of states (VDOS) and  $n_{\text{BE}}$  the Bose-Einstein distribution function expressed as:

$$n_{\text{BE}}(\omega, T) = \frac{1}{e^{\frac{\hbar\omega}{k_B T}} - 1}, \quad (2)$$

where  $\hbar$  and  $k_B$  are the Planck and  $k_B$  Boltzmann constants, respectively.

The temperature-dependent VDOS was calculated by performing Fourier transform of the velocity autocorrelation function extracted from long molecular dynamics simulations. High-energy, unoccupied vibrational states do not contribute to the cumulative occupation function (Supplementary Fig. 7). At  $T = 0$  K, and neglecting quantum nuclear effects, optical phonon modes are unoccupied, such that  $\chi(\omega, 0) = 0$ . As the temperature increases, low-frequency optical phonons, which are primarily responsible for the reduction of the band gap in CAP solid solutions (see main text), become progressively populated.
